# Supplementary material
Source: publisher site journal article supplement (https://www.dovepress.com/article/228718)

**Supplemental Figure 1**

Analysis of autophagy by AVO formation in A549/D16 cells  
The statistical analyses are listed on Figs 1C, 1F and 1I.

**Supplemental Figure 2**

Analysis of autophagy by AVO formation in A549/V16 cells  
The statistical analyses are listed on Figs 2C, 2F and 2I.

A549/D16

A

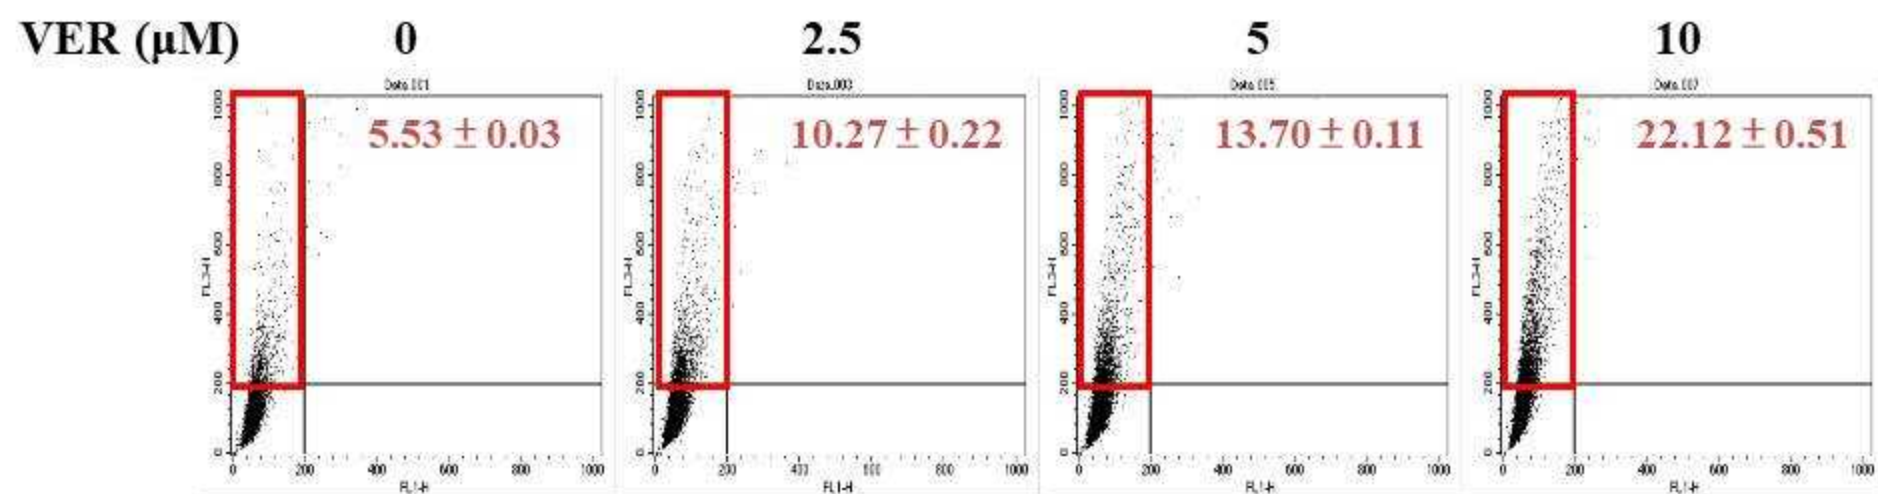

DOC 16 nM  
+  
VER ( $\mu\text{M}$ )

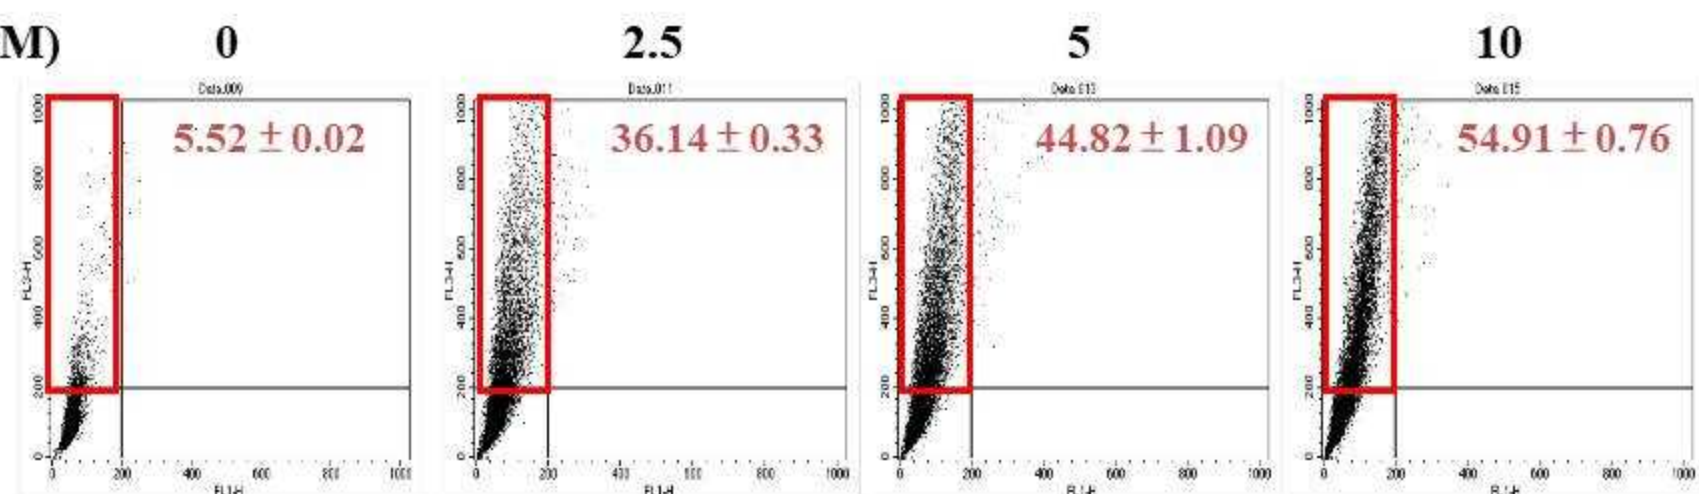

C

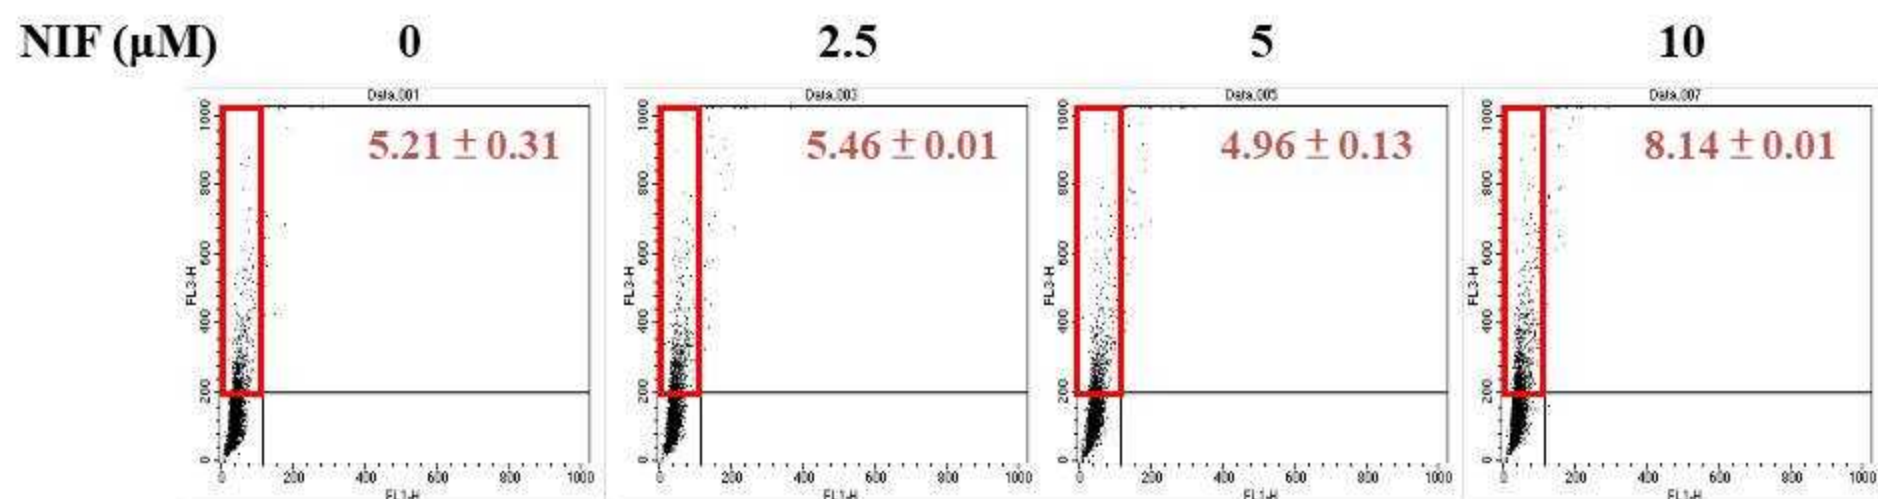

DOC 16 nM  
+  
NIF ( $\mu\text{M}$ )

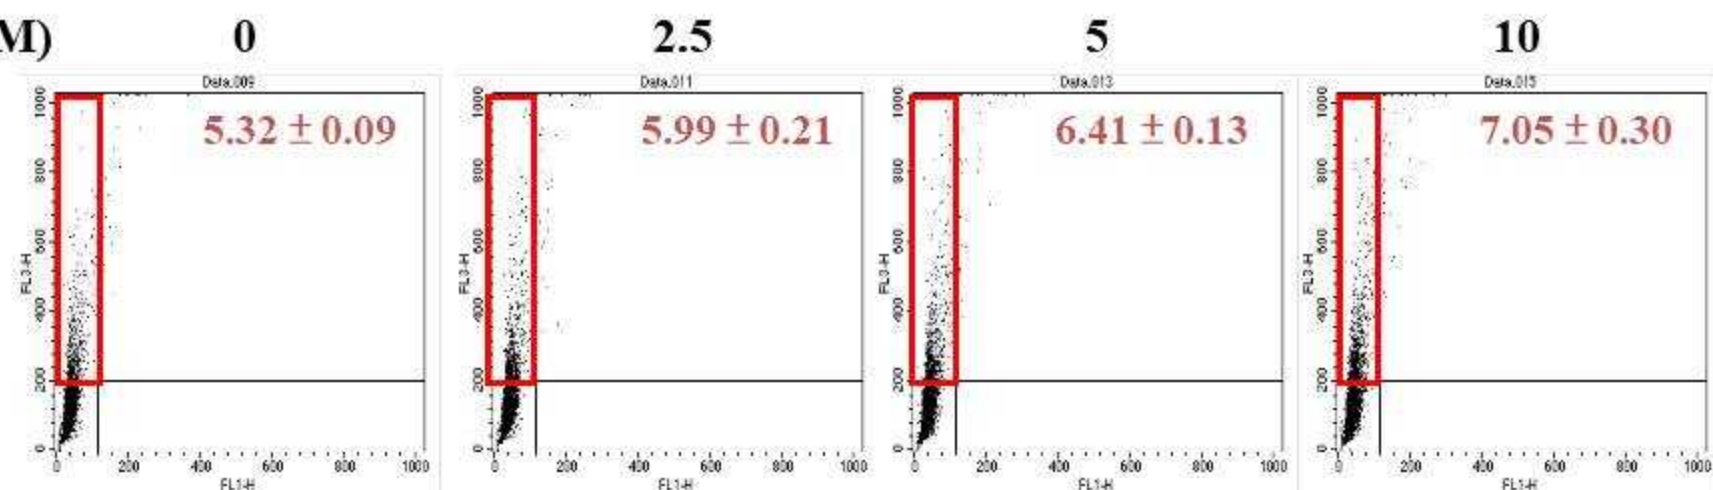

B

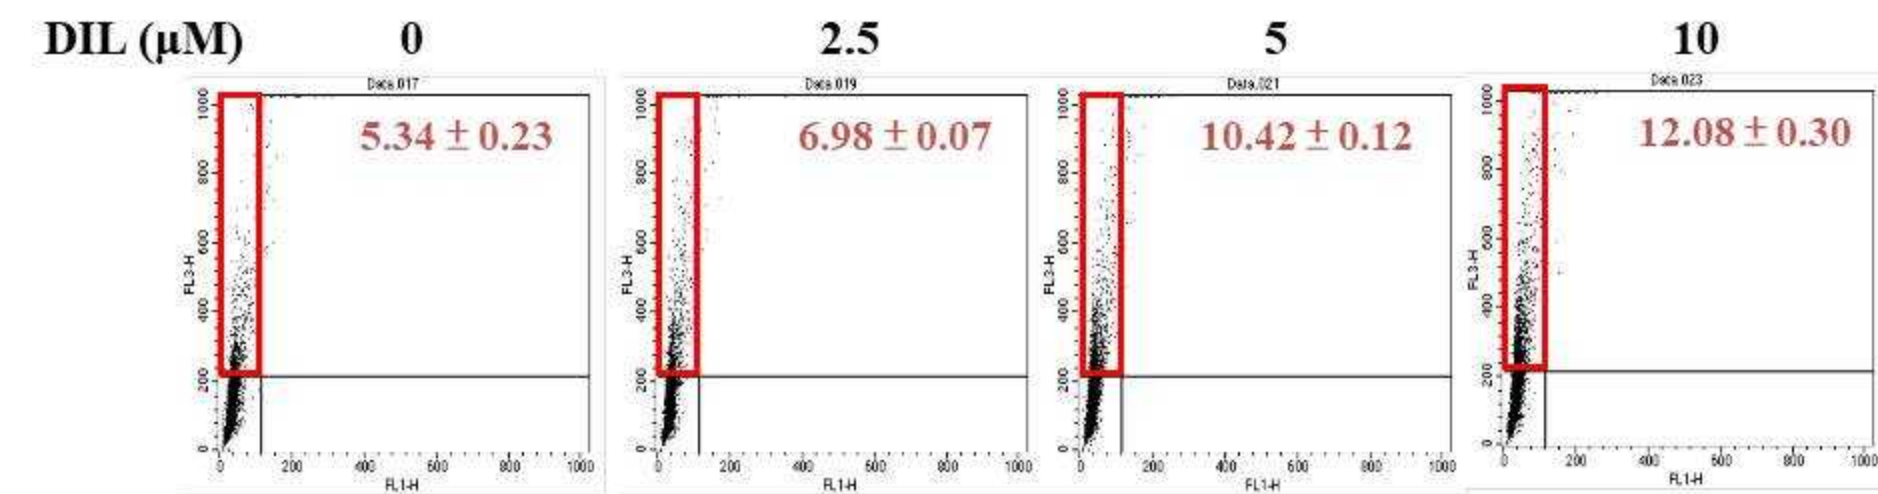

DOC 16 nM  
+  
DIL ( $\mu\text{M}$ )

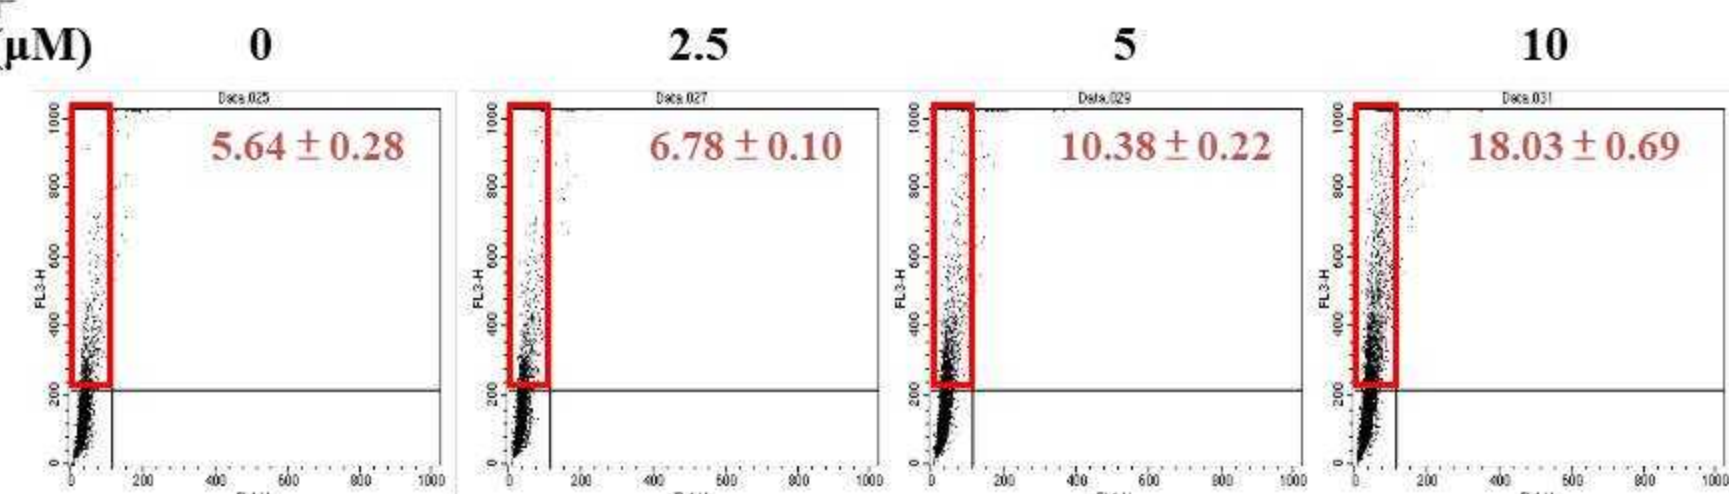



A549/V16

A

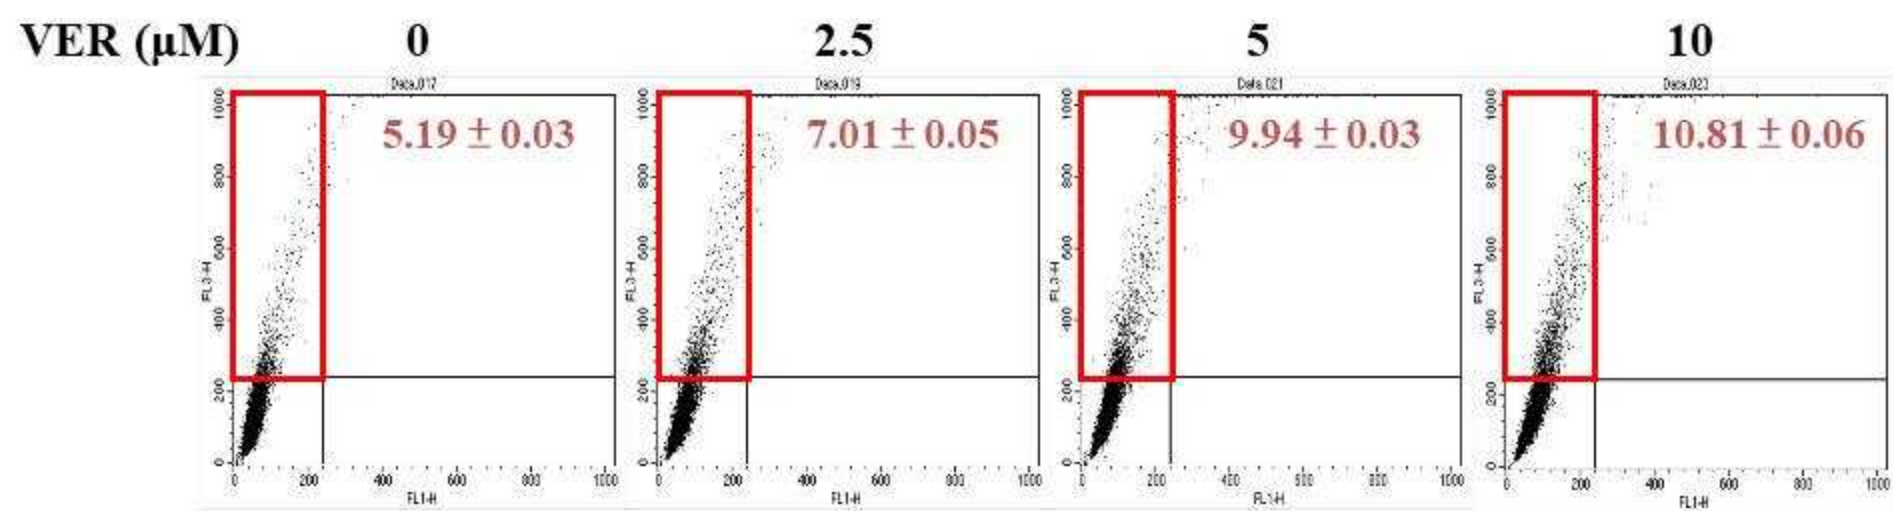

VCR 16 nM

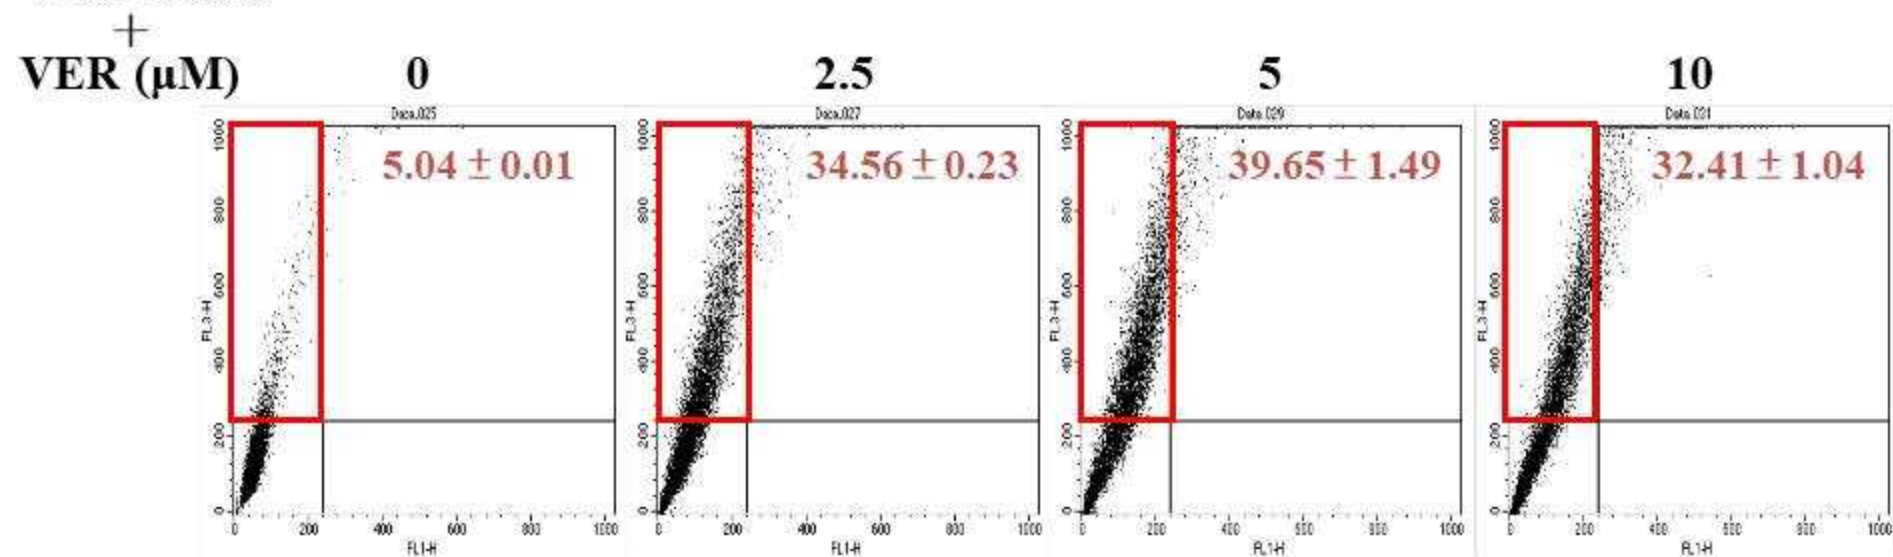

B

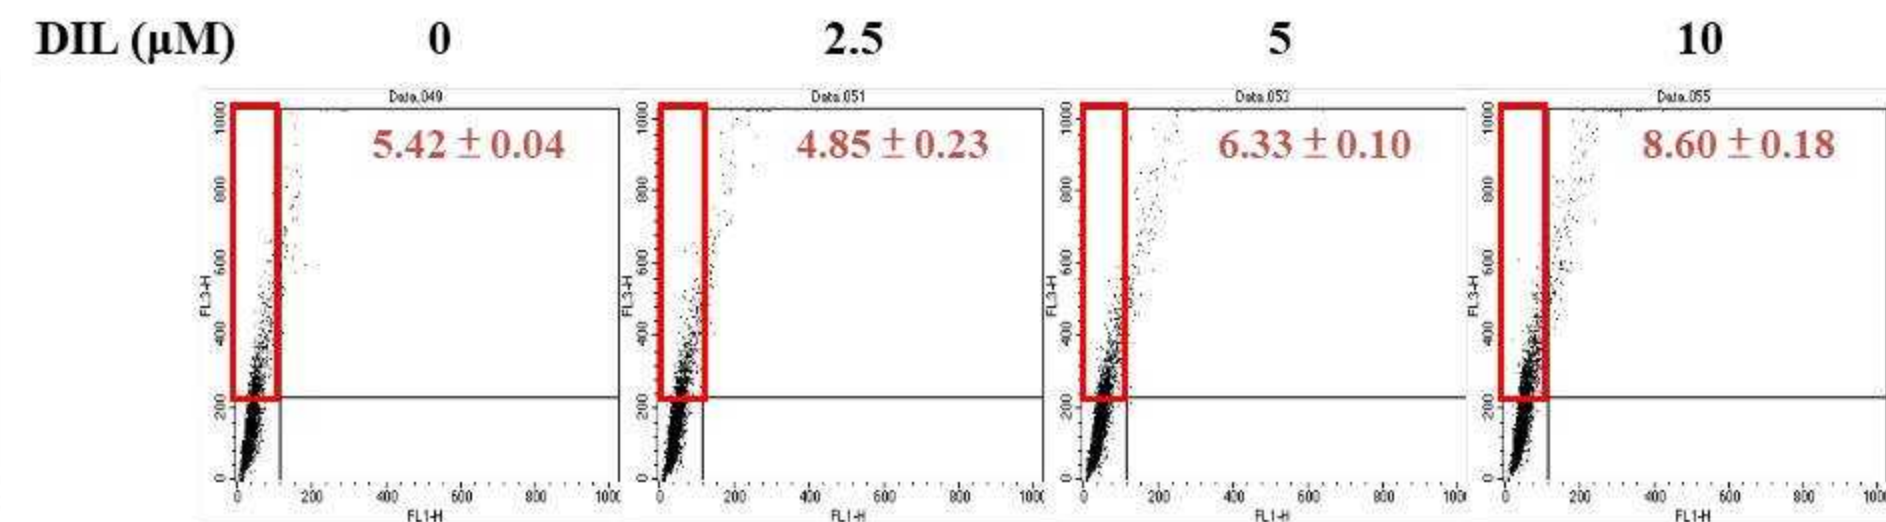

VCR 16 nM

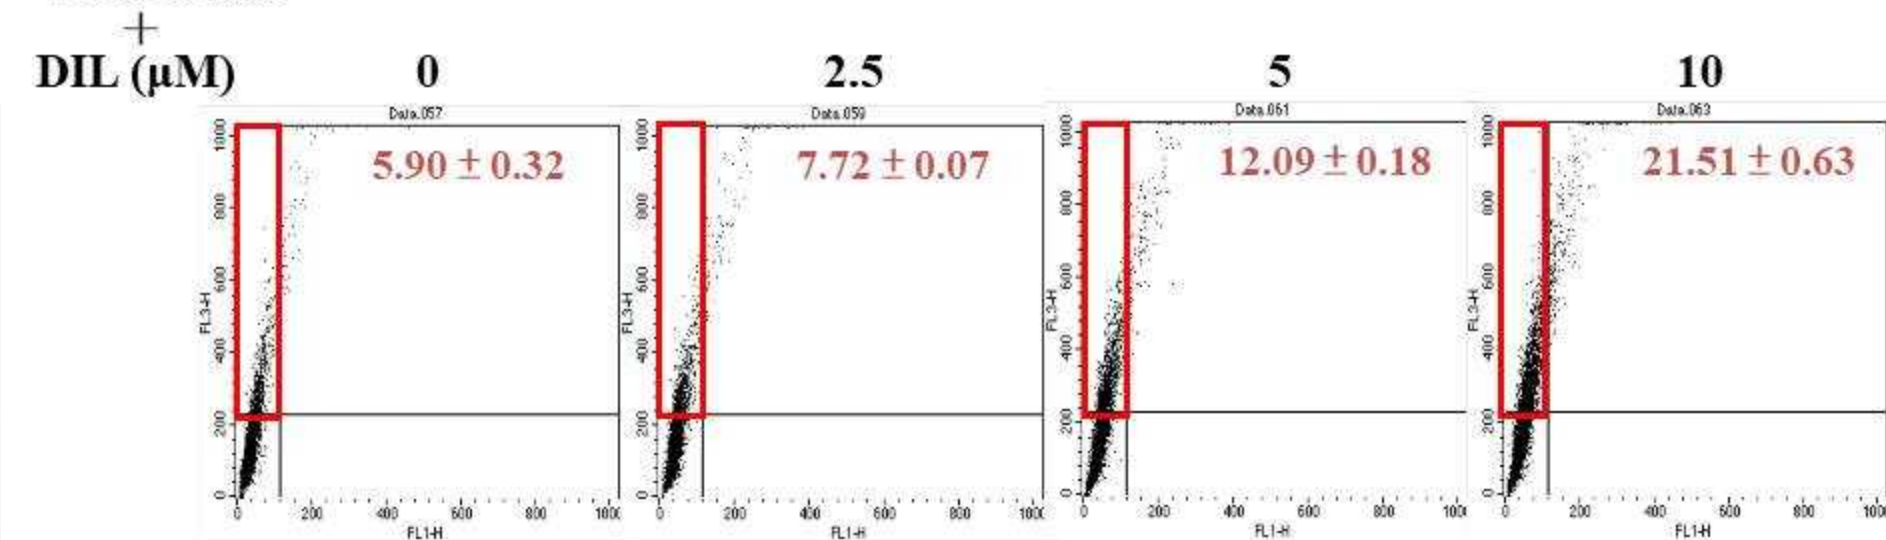

C

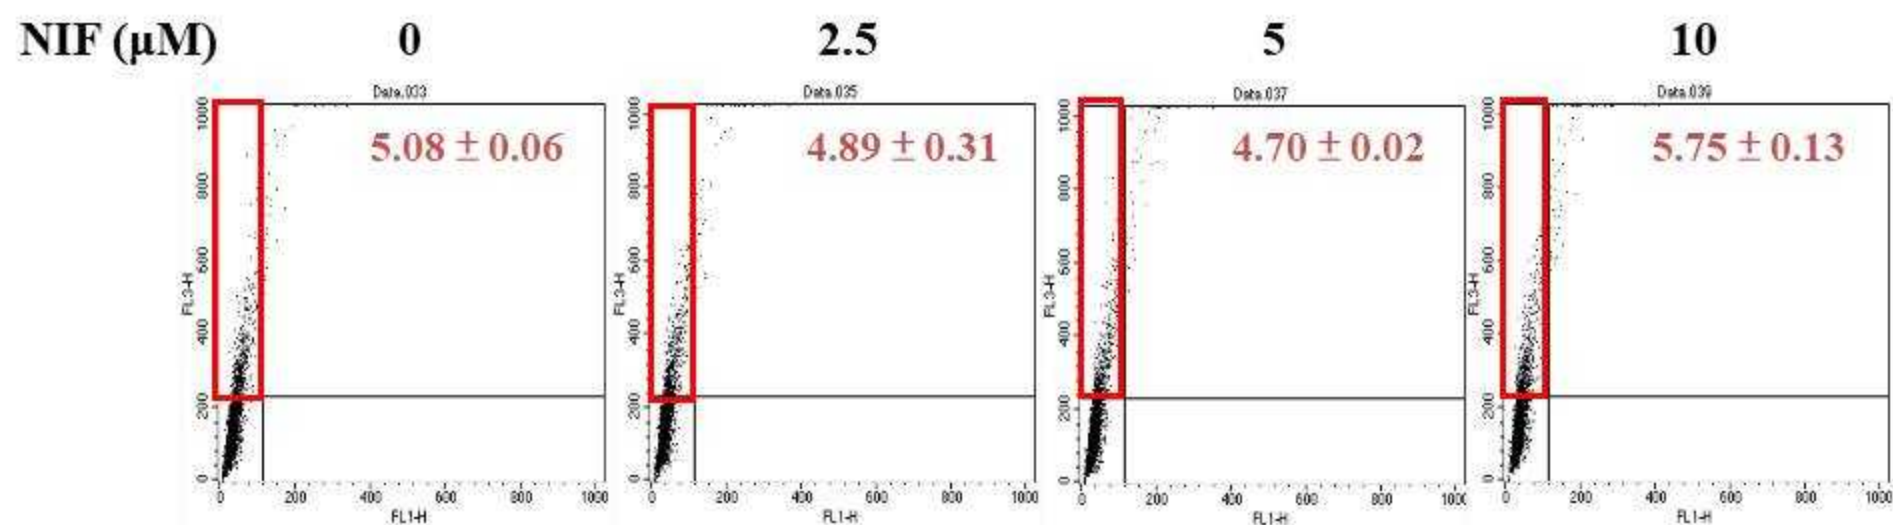

VCR 16 nM

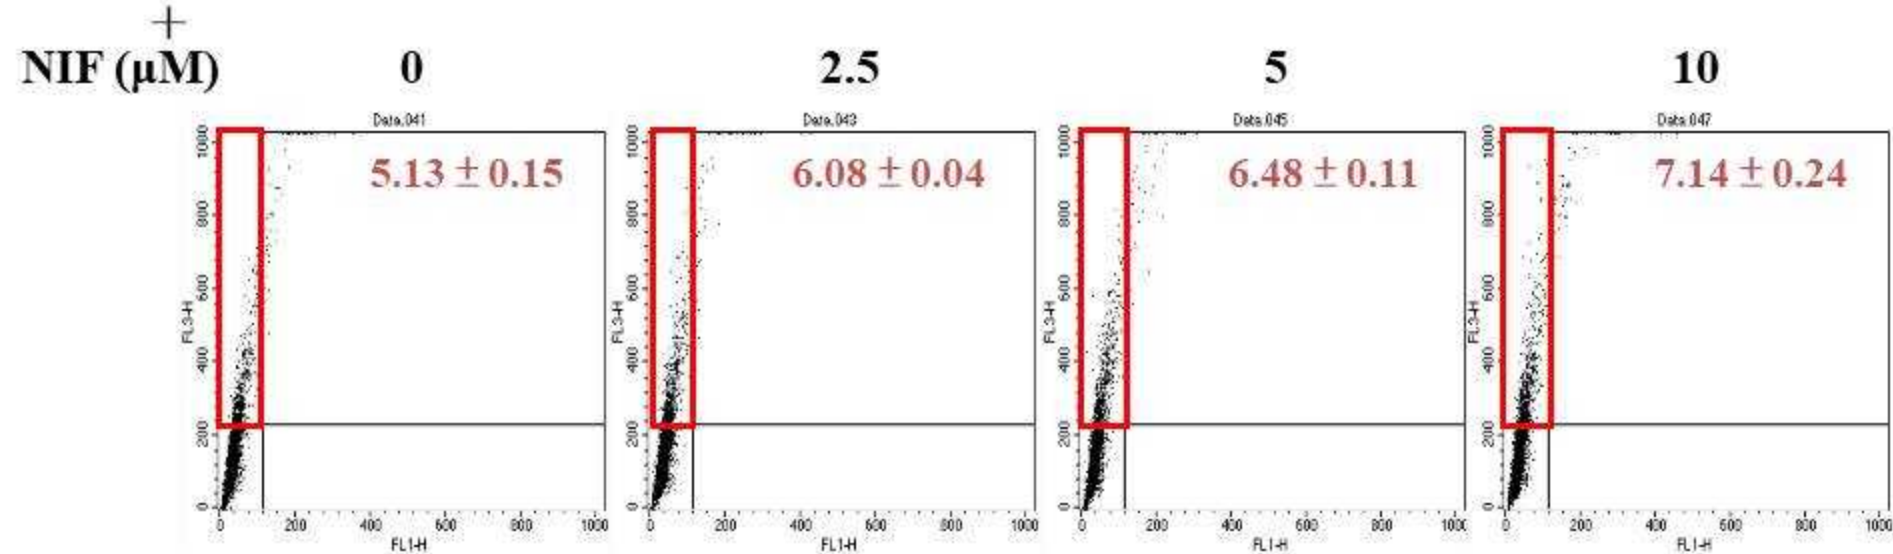

Supplement: Supplementary file 1 [file get_supplementary_file.php]
